# Supplementary material
Source: Springer Nature journal article supplement (https://www.springermedizin.de/resource/supplementary/13058_2013_3419_MOESM2_ESM.pdf/9704106)
Supplement: MOESM2 [file 9704106]

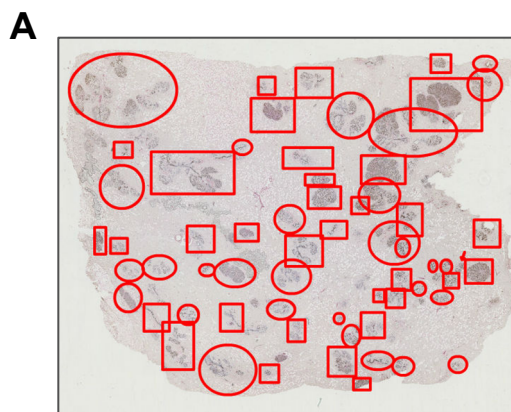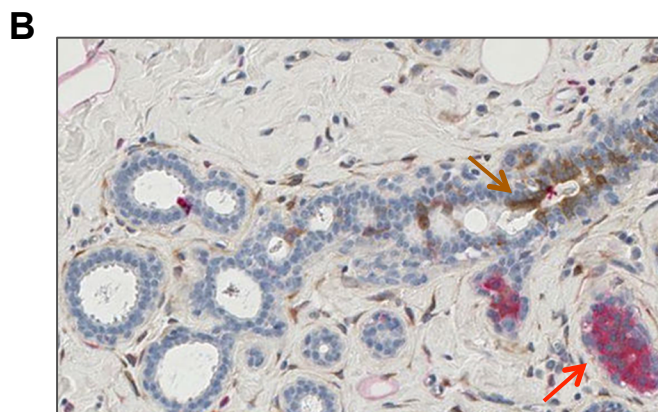

**C**

| Sample         | ALDE (%) | ALDH1A1 (%) | ALDH1A3 (%) |
|----------------|----------|-------------|-------------|
| <b>BN004</b>   | 6.7      | 4.8         | 1.3         |
| <b>BN010</b>   | 2.3      | 1.0         | N/A         |
| <b>BN017</b>   | 6.9      | 0.4         | 6.0         |
| <b>BN024</b>   | 1.7      | <0.1        | <0.1        |
| <b>BN036</b>   | N/A      | 1.5         | 0.8         |
| <b>Average</b> | 4.4      | 1.4         | 2.3         |
